# Supplementary material
Source: publisher site journal article supplement (https://www.dovepress.com/article/311725)
Supplement: Supplementary file 1 [file get_supplementary_file.php]

**Supplementary Figure legends**

**Figure S1 The GO analysis of DEGs in** **GSE96804 dataset.**

1. The top 5 biological process of GO terms. (B) The top 5 cell component of GO terms. (C) The top 5 molecular function of GO terms. (D) The heatmap of the GO terms.

**Figure S2 The common DEGs between GSE30528 and GSE96804 datasets.**

(A-B) The volcano map of GSE30528 and GSE96804 dataset. C3 and C7 were both upregulated in the two datasets.

(C-D) The heatmap of GSE30528 and GSE96804 datasets.

(E) The venn map of common DEGs between GSE30528 and GSE96804 datasets.

(F) The protein-protein interaction network of the common DEGs in between GSE30528 and GSE96804 datasets.

**Figure S3** **The scRNA-seq analysis validation of C3.**

1. DN and control samples were integrated into a single dataset. PCT, proximal convoluted tubule; CFH, complement factor H; LOH, loop of Henle; DCT, distal convoluted tubule; CT, connecting tubule; CD, collecting duct; PC, principal cell; IC, intercalated cell; PODO, podocyte; ENDO, endothelium; MES, mesangial cell; LEUK, leukocyte. (B) The distribution of C3 in different cells between healthy controls and DN. (C) The relative expression level of C3 in identified cell types between healthy controls and DN. (D)The percent expression of C3 in identified cell types between healthy controls and DN.

**Figure S4 The DEGs in GSE9006.**

(A-B) The volcano map of Type 1 (A) and Type 2 (B) diabetic samples from GSE9006 dataset. C7 was not significant expressed in Type 1 and Type 2 diabetic samples.

Figure S1


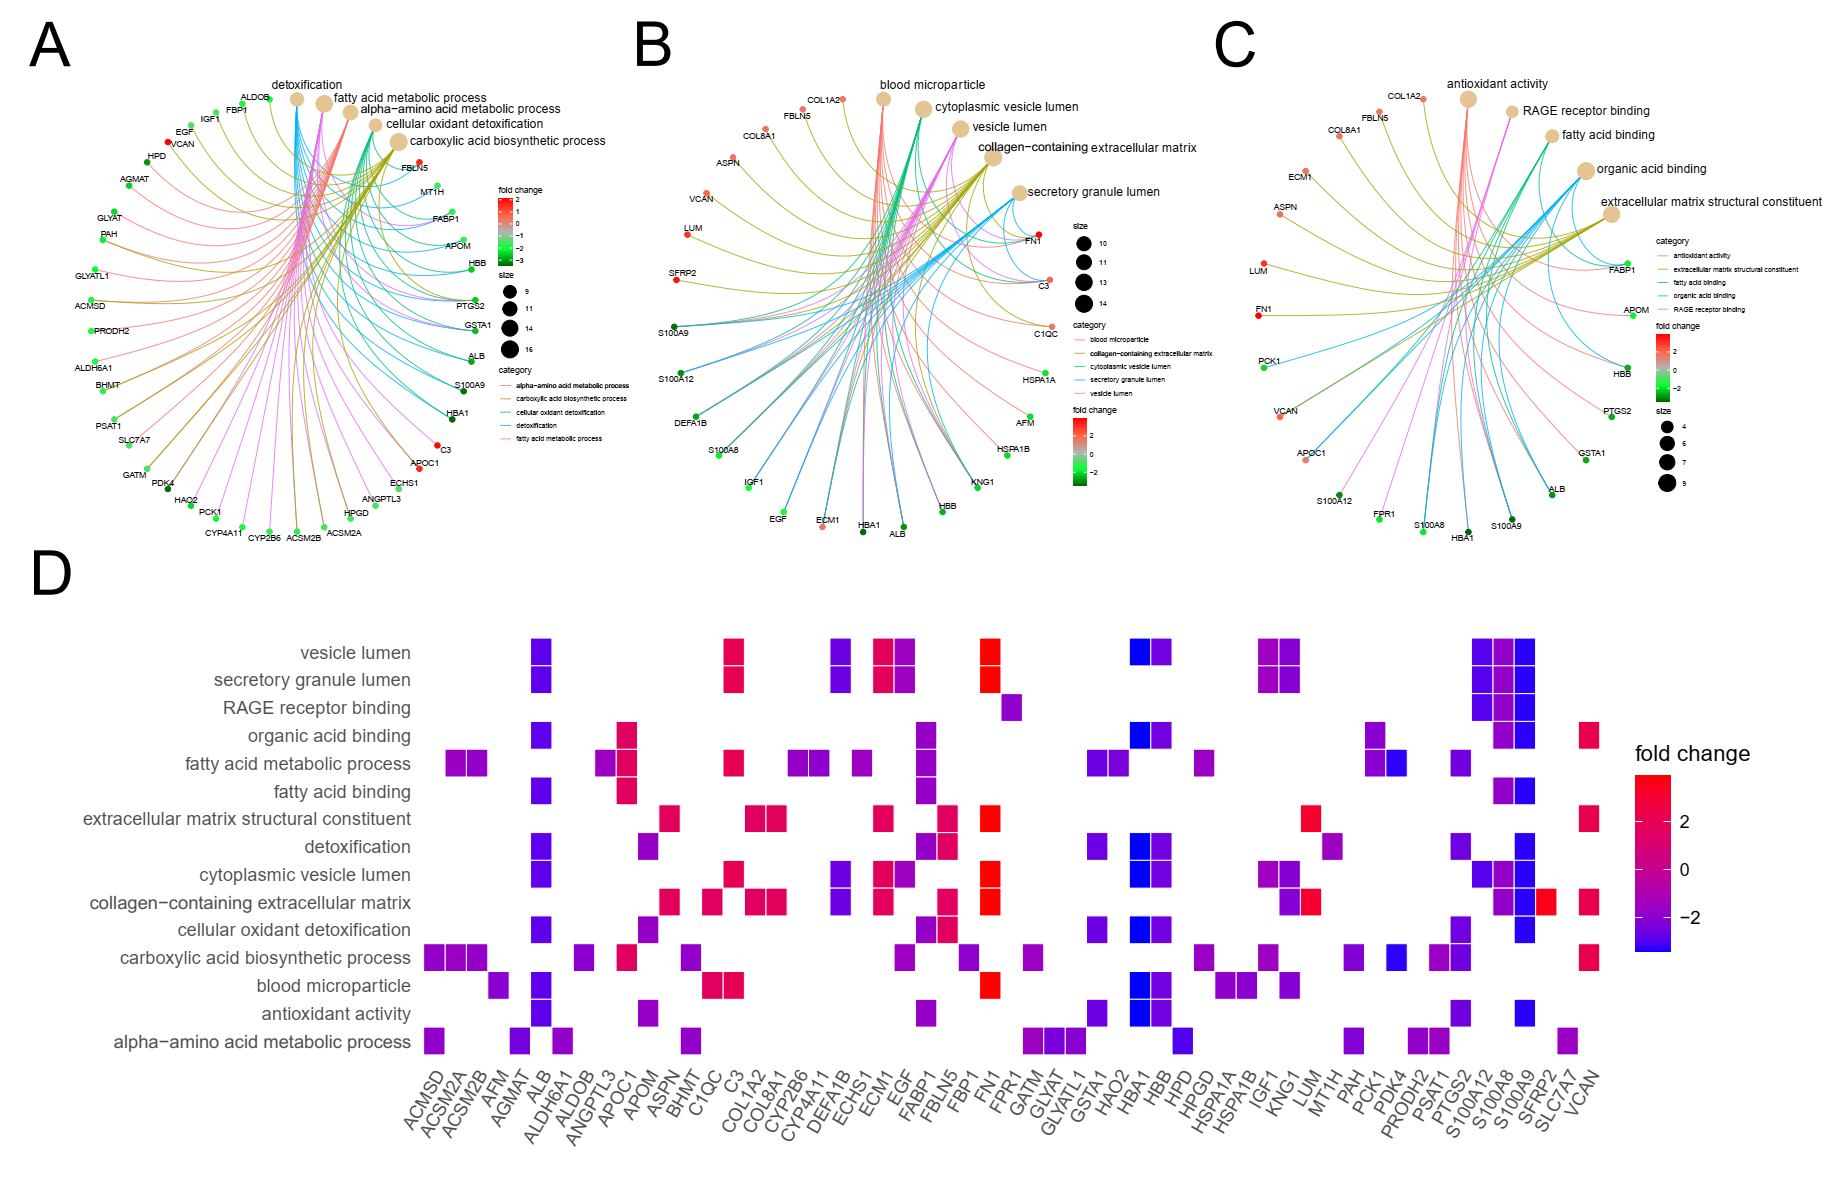


Figure S2


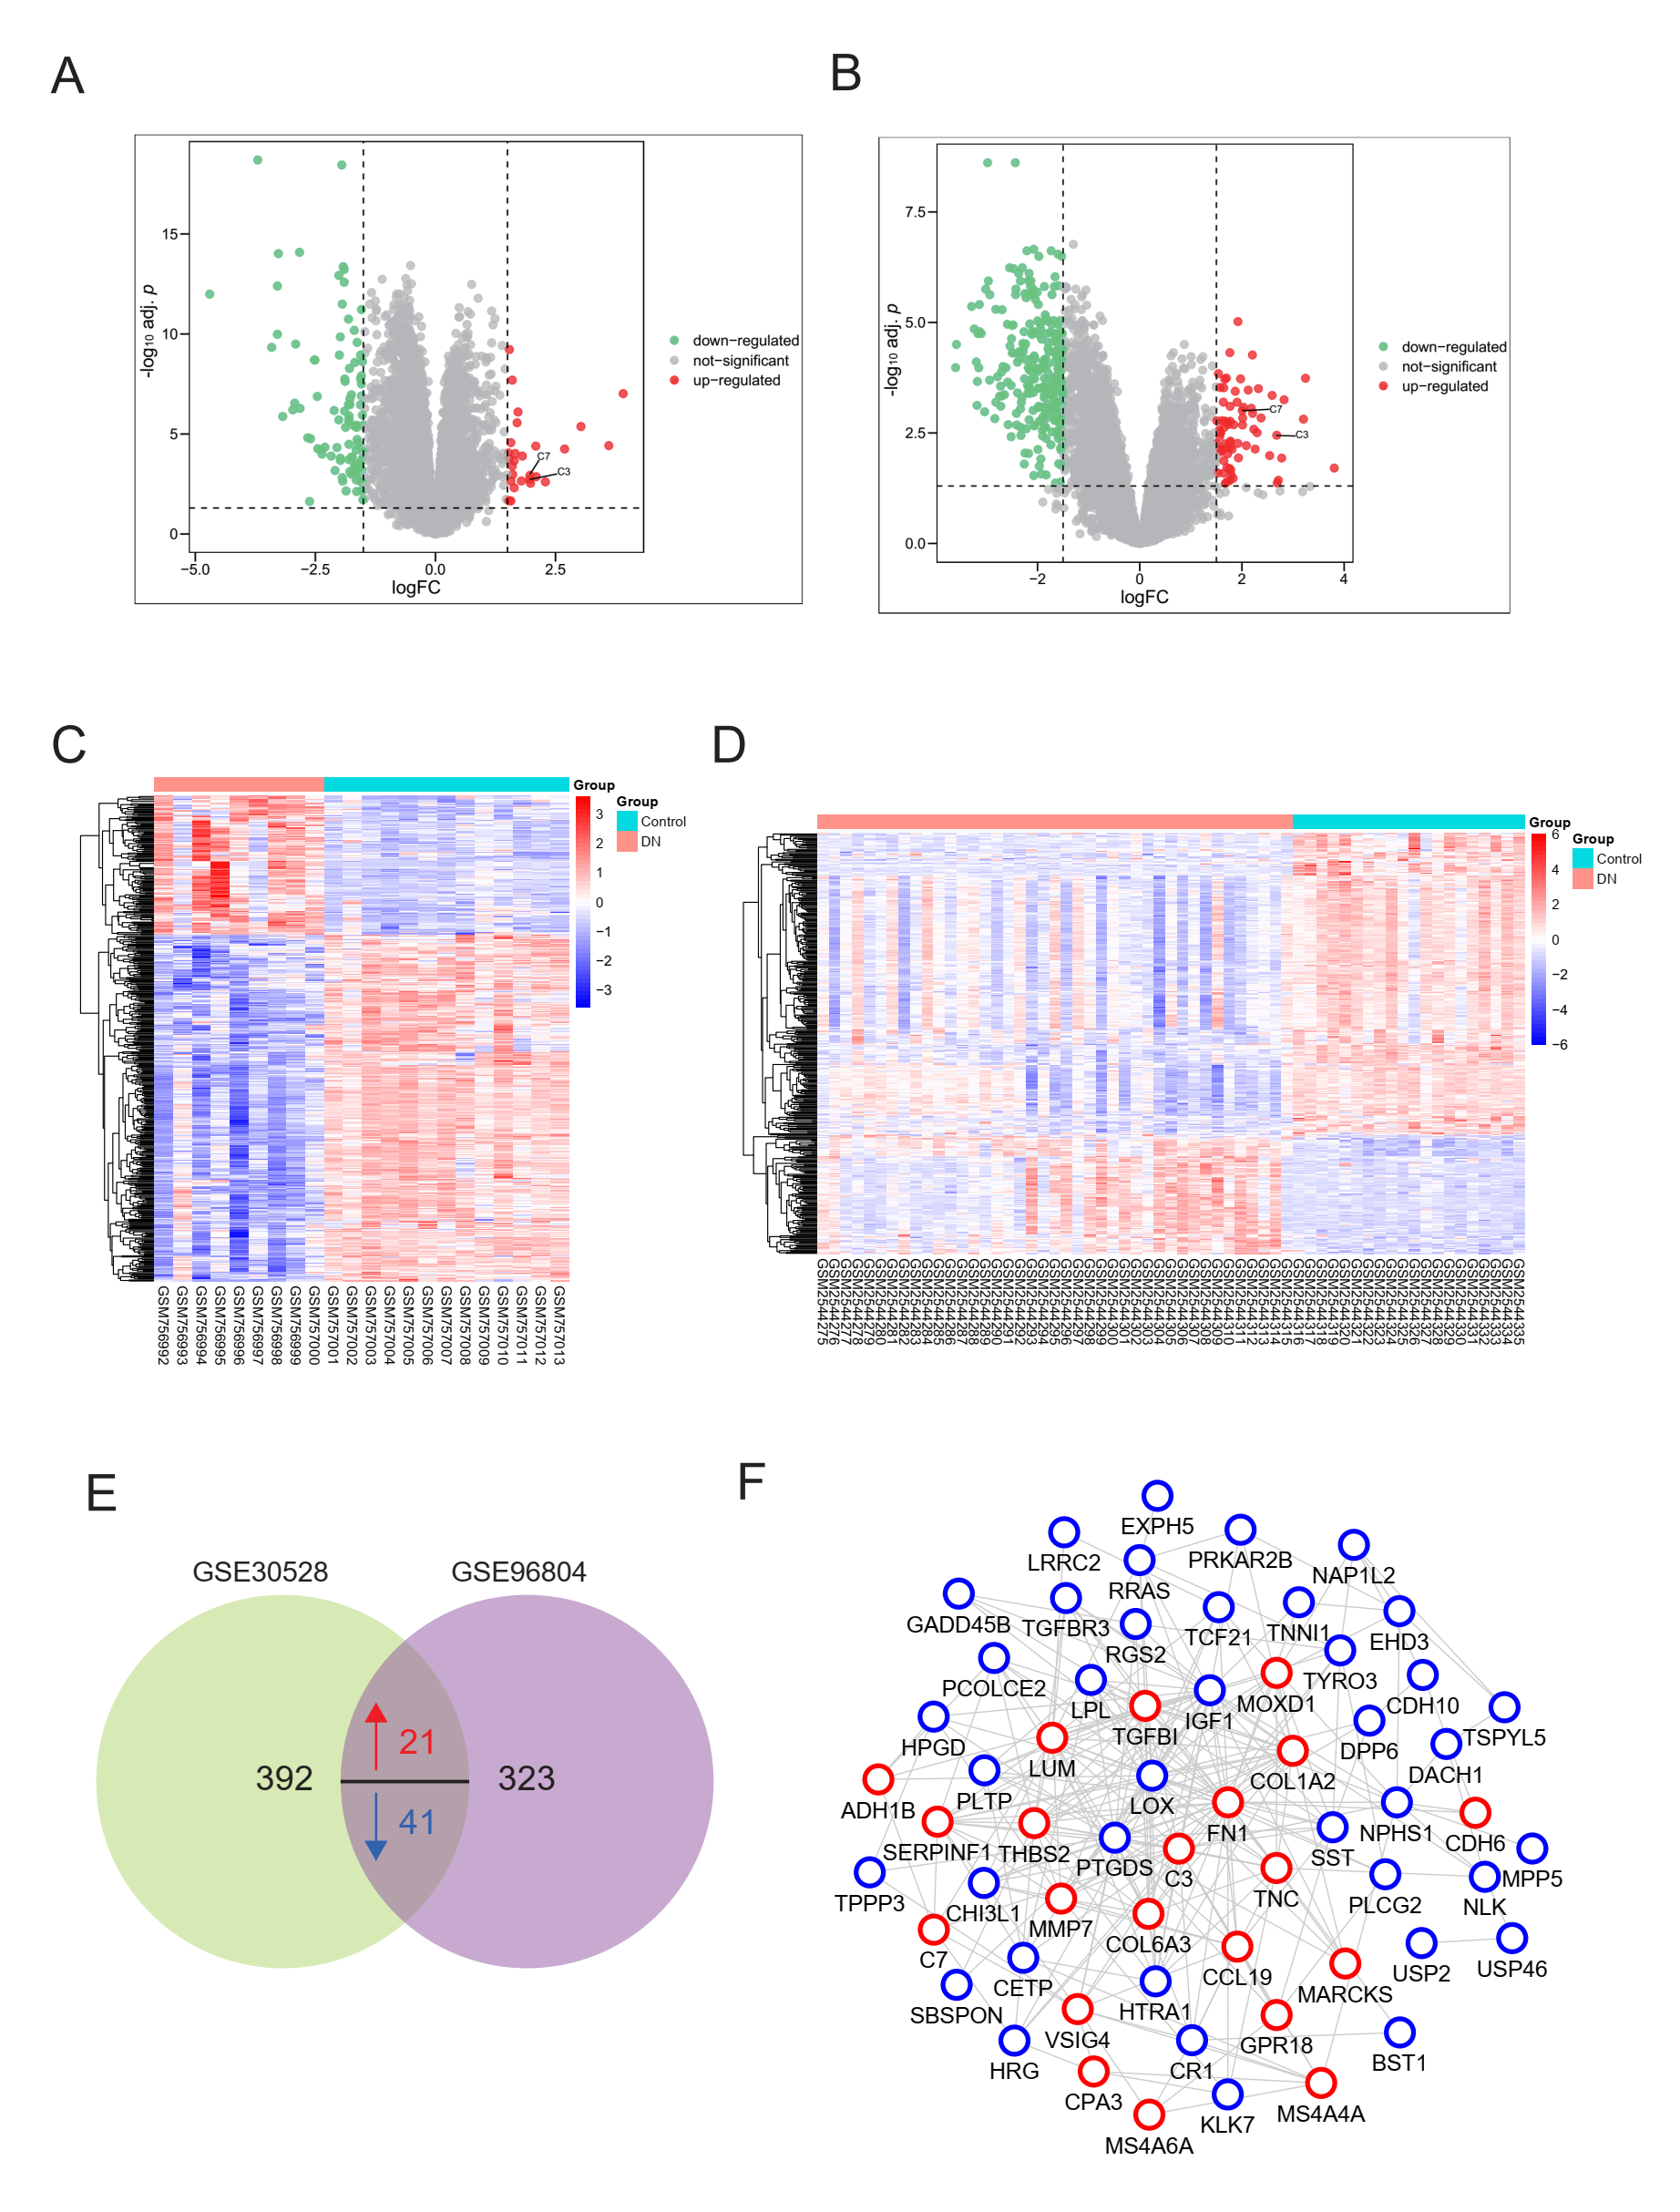


Figure S3


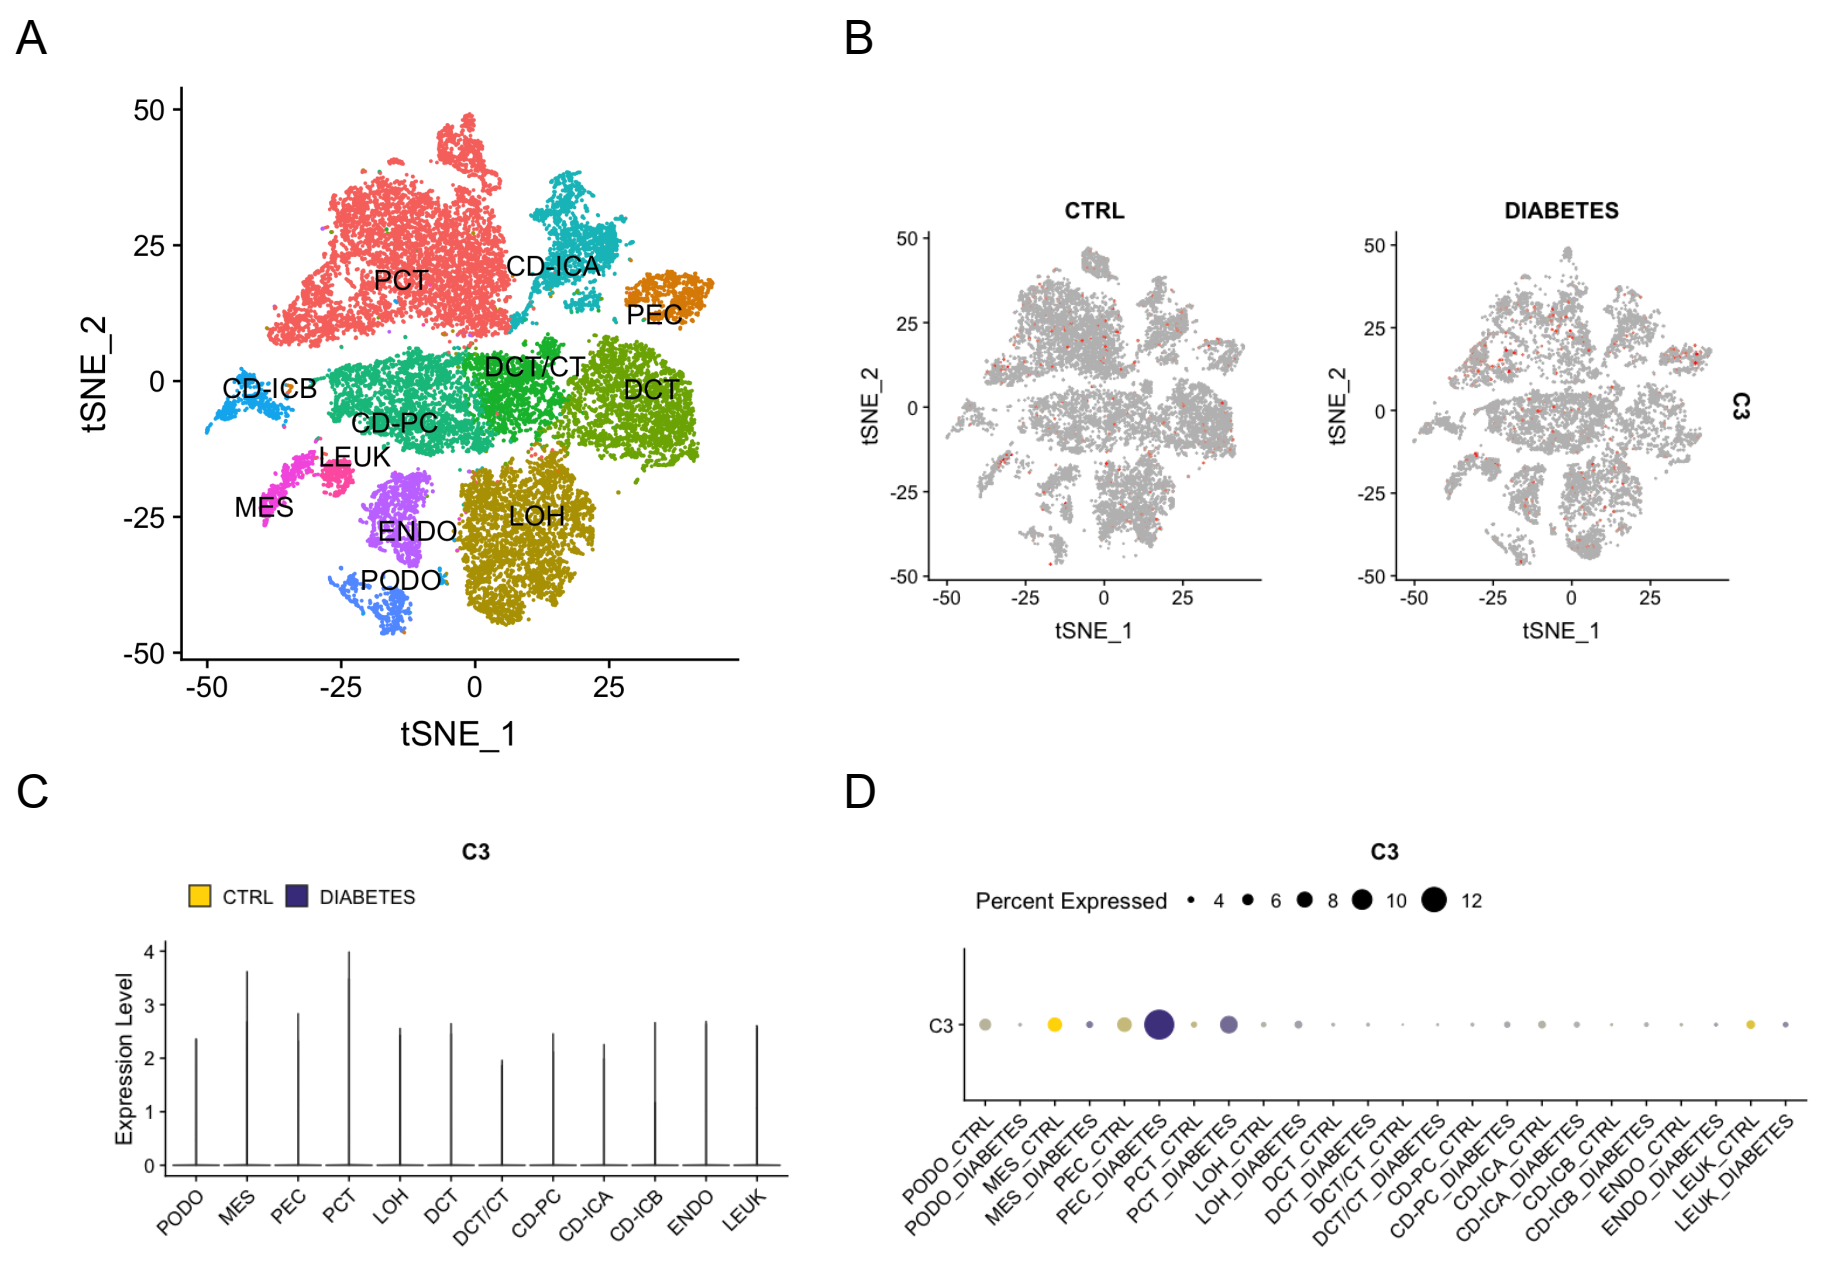


Figure S4


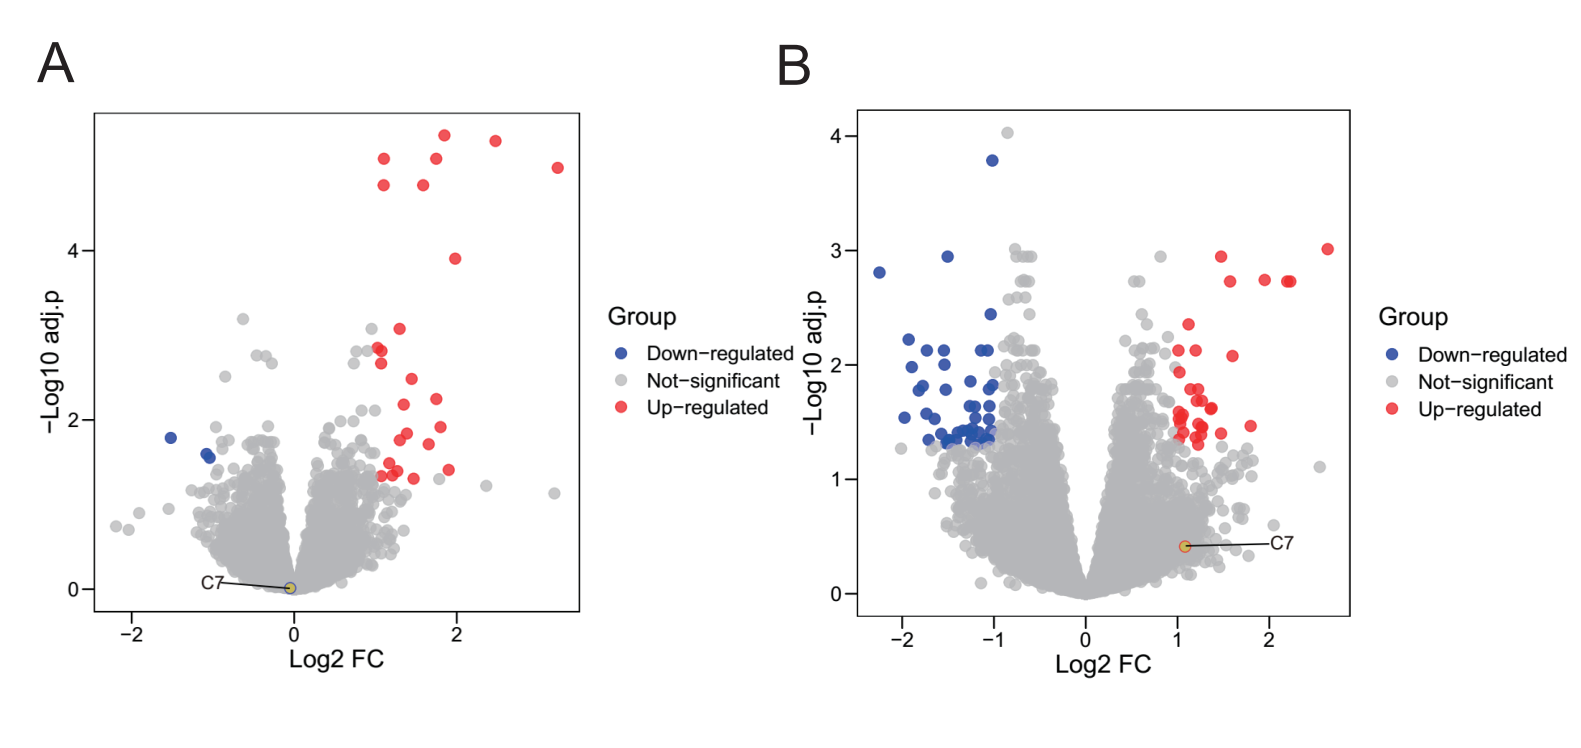


**Tables**

**Table S1. The differentially expressed genes in green module**

| Genes | P-Value | log2FC |
| --- | --- | --- |
| COL6A3 | 0.00114 | 2.2092967 |
| LUM | 0.00145 | 2.3746193 |
| LTF | 0.00154 | 3.2036143 |
| ARL4C | 0.00377 | 1.5662343 |
| COL1A2 | 0.00268 | 1.5589439 |
| C1QB | 0.0000544 | 2.2046858 |
| C7 | 0.000984 | 2.0070538 |
| THBS2 | 0.00145 | 2.0139856 |
| CD53 | 0.00171 | 1.6720554 |
| CD163 | 0.000635 | 1.6363295 |
| IRF8 | 0.00316 | 1.5832472 |
| CD48 | 0.00205 | 1.7367058 |
| MMP7 | 0.00611 | 2.0864495 |
| ABCA8 | 0.0135 | 1.6467035 |
| EVI2A | 0.00206 | 1.8399305 |
| GZMA | 0.00741 | 1.8060946 |
| GHR | 0.000216 | -1.8007286 |
| CPA3 | 0.000831 | 2.031023 |
| IL7R | 0.00848 | 1.5867266 |
| TDO2 | 0.00306 | 1.5665464 |
| CXCL6 | 0.00733 | 2.2583625 |
| GZMK | 0.00523 | 1.7674232 |
| LTB | 0.0193 | 1.7084566 |
| BLNK | 0.00557 | 1.5047605 |
| CORO1A | 0.00726 | 1.5717644 |
| ADH1B | 0.000873 | 2.1839657 |
| MOXD1 | 0.000638 | 1.905562 |
| HGF | 0.00773 | 1.6040717 |
| CCL19 | 0.0116 | 1.9312706 |
| TRBC1 | 0.00209 | 2.0115272 |
| CD3D | 0.0024 | 1.6492245 |
| LYZ | 0.0255 | 1.5295324 |
| C3 | 0.00356 | 2.6799609 |
| C1QA | 0.00000955 | 1.9222762 |
| MS4A6A | 0.00036 | 1.8690374 |
